# Supplementary material for: Food and beverage industry interference in science and policy: efforts to block soda tax implementation in Mexico and prevent international diffusion
Source: PubMed Central journal article supplement — BMJ Glob Health. 2021 Aug 19;6(8):e005662. doi: 10.1136/bmjgh-2021-005662 (PMC8378381; doi:10.1136/bmjgh-2021-005662), 2021-08-19
Supplement: bmjgh-2021-005662supp002.pdf [file bmjgh-2021-005662supp002.pdf]

# Interferencia de la industria de alimentos y bebidas en ciencia y políticas públicas: Esfuerzos para bloquear la implementación del impuesto al refresco en México y prevenir la difusión internacional.

Andrea Pedroza-Tobias,<sup>1</sup> Eric Crosbie,<sup>2, 3</sup> Melisa Mialon,<sup>4</sup> Angela Carriedo,<sup>5</sup> Laura A Schmidt<sup>6,7\*</sup>

## Cómo citar

(versión original, en inglés): Pedroza-Tobias A, Crosbie E, Mialon M, et al. Food and beverage industry interference in science and policy: efforts to block soda tax implementation in Mexico and prevent international diffusion. *BMJ Global Health* 2021;0:e005662. doi:10.1136/bmjgh-2021-005662

Editor asignado:  
Seye Abimbola

El material suplementario adicional únicamente se encuentra publicado en línea. Para verlo, favor de visitar la revista en línea (<http://dx.doi.org/10.1136/bmjgh-2021-005662>).

Recibido  
9 marzo 2021  
Aceptado  
14 julio 2021

Correspondencia:  
Dr. Laura A Schmidt;  
[Laura.Schmidt@ucsf.edu](mailto:Laura.Schmidt@ucsf.edu)

## RESUMEN

México es el mercado de refrescos más grande a nivel mundial, con las mayores tasas de obesidad y diabetes tipo 2. Debido a la carga en la productividad y gastos en salud en la nación, los legisladores mexicanos implementaron uno de los primeros impuestos de salud pública en bebidas azucaradas (BA) en el mundo. Como este impuesto en México fue diseñado para reducir el consumo de BA, enfrentó una fuerte oposición de corporaciones de alimentos y bebidas transnacionales. Analizamos documentos internos y previamente secretos de las principales corporaciones de la industria, encontrados en el *Food Industry Documents Archive* (“Acervo de Documentos de la Industria Alimentaria”) de la Universidad de California San Francisco, que revela información sobre la respuesta de la industria al impuesto mexicano de BA. Además, revisamos todos los estudios disponibles sobre la efectividad del impuesto al refresco en México, contrastando los resultados de los estudios financiados por la industria y los estudios no financiados por la industria. Encontramos que la industria de alimentos y bebidas y grupos frontales pagaron a científicos para producir estudios que sugieren que el impuesto no estaba logrando obtener beneficios en salud y que estaba dañando la economía. Estos resultados fueron difundidos antes de que los estudios no financiados por la industria pudieran terminar el proceso de revisión por pares. Aun así, México proporcionó el contexto real para los primeros estudios independientes revisados por pares que documentaron la efectividad del impuesto a las BA - estudios que fueron últimamente promovidos por la comunidad de salud global. Concluimos que, para el caso del impuesto a las BA en México, la resistencia de la industria puede persistir mucho después de que nuevas políticas se conviertan en ley, ya que sus intereses buscan revertir la legislación y paralizar o prevenir la difusión de políticas públicas. También resaltamos el rol decisivo que estudios revisados por pares y libres de conflicto de

interés pueden jugar en la implementación de innovaciones en políticas públicas de salud.

## PUNTOS CLAVE

- La oposición de la industria de alimentos y bebidas puede intensificarse después de que se haya promulgado un impuesto a las bebidas azucaradas (BA) porque los intereses creados esperan debilitar o retrasar la implementación e impedir la difusión de estas políticas a otros países.
- Después de que el impuesto mexicano a las BA entró en vigor en 2014, empresas transnacionales de alimentos y bebidas reclutaron a científicos para producir evidencia que pudiera ser creíble de que esta política no estaba logrando su objetivo de reducir el consumo de BA.
- Estudios financiados por la industria fueron rápidamente difundidos y amplificados fuera de la literatura científica, en medios de comunicación internacionales y en las discusiones globales sobre políticas públicas de salud, para argumentar que el impuesto no estaba logrando su objetivo de reducir el consumo de BA.
- En última instancia, México desempeñó un papel decisivo en la atención internacional sobre los impuestos a las BA al proporcionar el primer contexto del mundo real para los estudios revisados por pares que documentaron su efectividad.

## INTRODUCCIÓN

México es el mercado de refrescos más grande a nivel mundial, con un consumo promedio de 151 litros per cápita al año. [1] El país además tiene altas tasas de obesidad y diabetes tipo 2. [2] Debido a la carga en la productividad y gastos en salud en la nación, el 1 de enero del 2014, como parte del presupuesto federal, legisladores mexicanos implementaron uno de los primeros impuestos de salud pública en bebidas azucaradas (BA).[3] En ese momento, solo algunos países desarrollados, todos con un bajo consumo de BA, tenían estos impuestos (p. Ej., Francia, Finlandia)[4] pero no había estudios empíricos sobre su efectividad, sino solo simulaciones de elasticidad del precio, basadas en impuestos al alcohol y tabaco. Estas simulaciones sugerían que un aumento en 10% en el precio de BA estaba asociado con una disminución en el consumo del 11%. [5,6]

Desde que México implementó su impuesto, el impuesto a BA se ha convertido en un movimiento internacional. [7] Treinta y cinco países en el mundo han adoptado políticas de impuesto a BA, incluyendo Chile, India y Reino Unido.[4,8] Tres revisiones sistemáticas concluyen que el impuesto es efectivo en reducir el consumo de BA,[9–11] con los primeros estudios empíricos basados en México.[12–17]

Debido a que los impuestos están diseñados para reducir el consumo de BA, las propuestas de impuestos al refresco y estrategias de salud pública relacionadas (p. Ej., etiquetados de advertencia y prohibiciones de venta de BA en escuelas) habitualmente han enfrentado oposición por parte de las corporaciones transnacionales de alimentos y bebidas en México y a nivel mundial.[18,19] Una estrategia clave de la oposición es financiar científicos para producir evidencia que favorezca los intereses de la industria.[18,20] La oposición de la industria en los debates sobre la aprobación del impuesto al refresco en México ha sido previamente documentado,[19,21–24] sin embargo, poco se sabe sobre las tácticas de la industria después de que la política entró en vigor.

Revisamos y organizamos en orden cronológico documentos internos de la industria previamente secretos, que se encuentran en el *Food Industry Documents Archive*[25] (“Acervo de Documentos de la Industria Alimentaria”) de la

Universidad de California San Francisco, para investigar la respuesta de la industria a la implementación del impuesto a BA en México y en el contexto internacional (Tabla suplementaria 1). Este repositorio de acceso abierto al público contiene notas internas, correos electrónicos y otras comunicaciones privadas entre ejecutivos de las principales corporaciones transnacionales de bebidas como Coca-Cola y los investigadores que financian. Estos documentos, muchos de los cuales fueron obtenidos mediante litigación y leyes de libertad de información, brindan una mirada hacia los motivos, intereses y estrategias detrás de escena de las corporaciones transnacionales de alimentos y bebidas que se resisten a las regulaciones como los impuestos diseñados para reducir el consumo de alimentos y bebidas ultra-procesadas a nivel poblacional. Además, usamos métodos de análisis cualitativos, guiados por el modelo de distopía política,[26,27] para revisar todos los reportes de investigación sobre la efectividad de la política del impuesto en México. Comparamos los resultados de los estudios financiados por la industria y los estudios no financiados por la industria para entender el rol de la ciencia en este debate. (Ver material suplementario a este artículo para información sobre la fuente de los documentos y métodos del estudio).

## LA RESPUESTA DE LA INDUSTRIA DE BEBIDAS Y ALIMENTOS A LA IMPLEMENTACIÓN DEL IMPUESTO A BA EN MÉXICO

Durante 2014, la Secretaria de Salud en México, Mercedes Juan, quien previamente dirigió una organización de investigación financiada por Nestlé, creó el Observatorio Mexicano de Enfermedades no Transmisibles (OMENT) para monitorear la obesidad y la diabetes, incluyendo los resultados del impuesto a BA.[28] Juan nombró un consejo asesor con representantes vinculados a la industria de alimentos y bebidas,[21,29] incluyendo grupos comerciales que se opusieron al impuesto, argumentando que dañaría la economía.

En junio del 2015, científicos del gobierno mexicano reportaron que las ventas de BA disminuyeron 6% a nivel nacional debido al impuesto.[30] En julio, la Alianza Nacional de Pequeños Comerciantes (ANPEC) dio una conferencia de prensa para presentar información que sugería que 30,000 tienditas habían sido

forzadas a cerrar debido al impuesto.[31] Poco después, la Asociación Nacional de Productores de Refrescos y Bebidas Carbonatadas (ANPRAC) dio a conocer un estudio afirmando que el impuesto era regresivo porque afectaba negativamente a los mexicanos con baja capacidad de compra.[32] Poco tiempo después apareció otro estudio reportando que las ventas de BA habían disminuido entre 3-4.4%, representando una reducción insignificante en las calorías diarias para el mexicano promedio, mientras que estaba provocando una pérdida de 10,815 empleos.[33] Investigadores del Instituto Tecnológico Autónomo de México (ITAM) financiados por la industria publicaron otro estudio concluyendo que si bien las compras de BA habían disminuido 6.5%, las calorías totales sólo se habían reducido en un 1%, sin ningún impacto en obesidad.[34] (Ver tabla 2 del material suplementario para detalles de todos los estudios.)

A final del 2015, Coca-Cola y sus embotelladoras mexicanas empezaron a hacer cabildeo para una reducción en el impuesto en bebidas con menor contenido de azúcar para crear “un incentivo en función de la reducción de contenido calórico, para incidir de manera eficaz en el combate a la obesidad”. [35] La idea apareció en las recomendaciones de la Comisión de Hacienda y Crédito Público de la Cámara de Diputados para el presupuesto federal del año fiscal 2016.[36,37]

En septiembre del 2015, un mes antes de la votación sobre el presupuesto federal, la división mexicana del Instituto Internacional de Ciencias de la Vida (ILSI, por sus siglas en inglés), un falso grupo científico financiado por Coca Cola,[38] patrocinó el simposio nacional titulado “Edulcorantes y Salud”. El *Rippe Lifestyle Institute*, localizado en Shrewsbury, Massachusetts, un centro que provee servicios de investigación a corporaciones de bebidas, incluyendo Coca-Cola y PepsiCo, co-patrocinó el simposio.[39] En una serie de correos electrónicos privados, su fundador, el Dr. James Rippe, contactó otros académicos de los Estados Unidos para reclutar científicos para presentar su investigación en el simposio, prometiendo un modesto honorario si decides enviar tu presentación en una de las revistas de la ASN [Sociedad Americana de Nutrición, por sus siglas en inglés] o a otra revista académica”. [40] Rippe señaló que “el simposio llega en un momento muy importante para México

y está relacionado con una serie de cuestiones que son muy importantes en este país.”[40] Los ponentes en el simposio argumentaron que “el azúcar no es el enemigo, el problema son las calorías”[41] y cuestionaron si México estaba “cobrando impuestos al grupo de alimentos correcto, si su intención es realmente frenar la obesidad”. [42] En la sesión plenaria, Rippe declaró que “gravar las bebidas azucaradas no va a reducir el consumo y no hará nada significativo para la obesidad y la diabetes.”[43] Durante el simposio, se circuló un reporte que argumentaba que aún con un impuesto mayor de 20-40%, el “impacto sobre el IMC [índice de masa corporal] sería marginal”. [44]

El simposio resultó en prensa negativa para ILSI México,[45] incluyendo críticas de que científicos internacionales fueron reclutados para “combatir el impuesto”[45,46] ILSI internacional terminó suspendiendo ILSI México “por participar en actividades que pueden interpretarse como incidencia en la política pública o esfuerzos de relaciones públicas para influir en las políticas públicas”. [47] En un correo electrónico privado, Alex Malaspina, quien fue director ejecutivo de ILSI internacional, escribió a James Hill, un científico de la Universidad de Colorado y financiado por Coca-Cola, sobre “el lío en el que ILSI México está porque en septiembre patrocinó una conferencia de endulzantes cuando se estaba discutiendo el impuesto al refresco... un verdadero desastre”[48]

La propuesta de reducir el impuesto a BA en México finalmente fue aprobado en la Cámara de Diputados [49] pero fracasó en el Senado, dejando sin cambios la original política del impuesto.[50]

En enero del 2016, el primer estudio empírico y revisado por pares que evaluó el impuesto mexicano de BA fue publicado en BMJ.[12] Los actores de la industria respondieron en marzo del 2016 con otro simposio académico con científicos de México, Estados Unidos y Canadá financiados por la industria, quienes presentaron resultados de que los impuestos a los refrescos no logran impactar en la obesidad.[51] Unos meses después, ANPRAC creó una página web, [impuestoscaloricos.com](http://impuestoscaloricos.com), para diseminar estudios financiados por la industria mostrando que el impuesto mexicano no logró disminuir el consumo de BA ni la obesidad, mientras que este

representaba dificultades económicas significativas para la población más pobre.[52]

### EL IMPUESTO MEXICANO A BA EN EL CONTEXTO INTERNACIONAL

Nuestro análisis de los documentos internos de la industria reveló que ejecutivos de Coca-Cola aprovecharon de sus relaciones globales para diseminar los estudios financiados por la industria, junto con mensajes claves de que el impuesto mexicano no logró disminuir el consumo de BA y que era dañino para la economía.[53–58] En el 2015, el gerente de relaciones públicas de Coca-Cola internacional envió por correo electrónico algunos de estos estudios a ejecutivos en Comunicaciones y Relaciones Gubernamentales como “actualizaciones relevantes y útiles sobre el impuesto especial al consumo en México...[para] dialogar con actores clave y demostrar por qué un impuesto al consumo en nuestros productos no son mecanismos efectivos de política pública y pueden tener consecuencias negativas involuntarias, como una pérdida significativa de empleos”.[59] El Vice-Presidente de Relaciones Gubernamentales y Asuntos Públicos de Coca-Cola también compartió los estudios con ejecutivos de la compañía en el equipo global de liderazgo del Pacífico señalando que “después de la llamada de hoy, por favor encuentre todos los materiales más recientes para responder a los argumentos de que el impuesto al consumo en México ha sido efectivo.”[59]

En enero del 2016, la Comisión para acabar con la obesidad infantil de la Organización Mundial de la Salud (OMS) emitió recomendaciones para que las naciones consideren el impuesto a BA como estrategia para la prevención de obesidad y enfermedades crónicas no transmisibles (ECNT).[60] Un documento “clasificado, únicamente para uso interno” de febrero-marzo 2016 destacó el grado en que los ejecutivos de Coca-Cola veían los impuestos a BA como una amenaza significativa para las iniciativas globales de la compañía. La [figura 1](#) se ha reimpresso de la estrategia internacional, encontrada en la biblioteca de la industria de alimentos, llamada “*Radar Screen*” (o “pantalla de radar”), la cual fue creada por gerentes senior en relaciones gubernamentales para Coca-Cola Europa. Dicha “*radar screen*” es una matriz de riesgo de políticas públicas. La matriz compara la amenaza de 49 políticas gubernamentales a los intereses de

negocios de Coca-Cola en la Unión Europea (eje de las Y) contra la probabilidad de que cada una se pueda materializar en países miembros (eje de las X). Notablemente, de todas las 49 políticas públicas, impuestos nuevos fueron evaluados a tener el mayor “impacto en los negocios” de Coca-Cola y también fueron valorados con una fuerte “posibilidad de materializarse”.

Cuando un reportero del *New York Times* expresó su interés en “explorar la premisa de que ha habido un aumento en el número de ciudades y estados que han propuesto el impuesto a bebidas...[y] que el incremento puede estar asociado al ‘éxito’ del impuesto en México”, el Vice-presidente de Políticas Públicas para la Asociación Americana de Bebidas (ABA, por sus siglas en inglés), compartió datos de un estudio mexicano financiado por la industria [34] mostrando que “el impuesto no ha logrado mejorar la salud, como sus proponentes argumentan, es regresivo y cuesta empleos”.[61] En seguimiento a una consulta del periódico *Wall Street Journal* sobre el estudio de BMJ publicado en 2016, que muestra una reducción en ventas de BA, el Director de Asuntos Globales y Comunicaciones de Coca-Cola refirió a los reporteros a agrupaciones comerciales quienes compartieron “múltiples estudios de instituciones muy respetadas en México (ITAM, COLMEX, UANL, apoyadas con financiamiento de la industria) que muestran claramente que el impuesto fue inefectivo.”[62] También les compartió el borrador de un estudio financiado por ABA que muestra que el consumo de BA en México regresó al consumo basal previo al impuesto, y que ocasionó una pérdida de 3,000 empleos-argumentos que acabaron siendo publicados en la prensa.[62]

En 2017, cuando el tercer artículo revisado por pares sobre el impuesto al refresco se publicó en *Health Affairs*, el cual mostró una reducción sostenida del consumo de BA durante dos años,[13] la Asociación del Consejo Internacional de Bebidas (ICBA, por sus siglas en inglés) intervino. Siendo la principal asociación comercial de la industria de bebidas a nivel global, ICBA emitió un comunicado mencionando que “el estudio no mostró ningún impacto del impuesto en las tasas de obesidad en México” y llamó a “soluciones basadas en evidencia” mediante asociaciones locales entre el gobierno y la industria.[63] ICBA diseminó una hoja informativa

a sus socios globales señalando “una docena de razones por las que un impuesto al refresco fracasará” citando estudios financiados por la industria. [64]

En 2018, en preparación para la Reunión de Alto Nivel de Naciones Unidas sobre Enfermedades no Transmisibles, comisiones de salud global discutieron el impuesto al refresco como una estrategia de prevención basada en evidencia, citando los estudios revisados por pares sobre el impuesto a las BA en México.[65] Comunicaciones internas por correo electrónico entre ejecutivos de Coca-Cola llamaron a esta reunión “el evento próximo más importante en el campo de las ECNT” y expresaron sus preocupaciones de que la delegación mexicana estaba entre los “proponentes más vocales de restringir la participación del sector privado con la OMS”. [66] En preparación para la reunión de alto nivel, la OMS publicó un reporte “*Es hora de actuar*”, que propuso las “mejores inversiones” para la prevención y control de las ECNT, incluyendo los impuestos al tabaco y alcohol.[67] En la consulta pública, ICBA levantó críticas metodológicas al artículo publicado en *Health Affairs*, mencionando que “lamentablemente los autores de este artículo se basaron en un modelo teórico”. [68] El reporte final *Es hora de actuar* de la OMS finalmente no recomendó formalmente los impuestos a las BA debido al desacuerdo de un delegado de los Estados Unidos,[69] pero reconoció un “amplio apoyo de muchos comisionados.”[67]

#### **MENSAJES CONTRASTANTES SOBRE EL IMPUESTO MEXICANO A LAS BEBIDAS AZUCARADAS ENTRE LOS ESTUDIOS FINANCIADOS POR LA INDUSTRIA Y LOS NO FINANCIADOS POR LA INDUSTRIA**

Los reportes financiados por la industria, ninguno de los cuales fueron revisados por pares, estuvieron disponibles dentro del primer año de la implementación del impuesto. No fue hasta enero del 2016 que evaluaciones no financiadas por la industria empezaron a aparecer en la literatura científica revisada por pares. (Ver Tabla 2 de material suplementario para detalles de los estudios). Identificamos que la industria de alimentos y bebidas financió estudios que produjeron estrategias discursivas alineadas con sus intereses, para restar importancia a la

efectividad del impuesto mexicano a las BA. (Tabla 3 del material suplementario)

Estudios financiados por la industria documentaron impactos negativos del impuesto a las BA en la economía mexicana, argumentando que la política ocasionaría pérdida de empleos, cierre de tiendas, y afectaría la economía del país, mientras que estudios no financiados por la industria no encontraron ninguno. Por ejemplo, un estudio financiado por la industria estimó, usando un modelo econométrico de insumo-producto, que el impuesto había ocasionado la pérdida de entre 10,815 y 42,385 empleos y una pérdida en la economía de 6,400 millones de pesos (\$378 millones de dólares) durante el primer año, lo que asciende a una pérdida de 0,4% del producto interno bruto (PIB).[33] En contraste, un estudio no financiado por la industria analizó tres encuestas con representatividad nacional para estimar cambios en las tasas de desempleo ajustando por variables contextuales. Los autores no encontraron un cambio significativo en empleo asociado al impuesto, y señalaron que las ventas de bebidas sin impuestos aumentaron para “compensar el potencial efecto negativo sobre el empleo”. [70]

Los estudios financiados por la industria hicieron argumentos relacionados con la justicia social, como criticar que el impuesto es regresivo, y argumentar que esta política es injusta para los más pobres: aunque los impuestos se recaudaron “principalmente en los hogares más ricos, la carga fiscal (era) mayor en los hogares más pobres”. [33] Los estudios financiados por la industria también argumentaron que “el costo de la política fue particularmente dañina en una situación donde son notables los problemas de inequidad y pobreza”. [32] Por el contrario, el primer estudio del impuesto revisado por pares y publicado en BMJ en el 2016,[12] encontró reducciones en la compra de BA desproporionalmente mayores en los hogares de más bajo ingreso, concluyendo que esto, más las ganancias en salud y productividad en esos hogares, podría potencialmente resultar en un efecto fiscal progresivo y no regresivo.

Con relación a los beneficios en salud pública, dos estudios financiados por la industria [33,34] y tres estudios no financiados por la industria[12,13,71] evaluaron cambios en las ventas de BA después de la implementación del impuesto a las BA. Aunque todos reportaron reducciones estadísticamente significativas en las



ventas de BA, que varían entre 3.4% y 7.3%, la interpretación de los resultados difiere dependiendo en quién financió el estudio. Estudios financiados por la industria interpretaron esas reducciones como insignificantes, considerando las calorías que representan en la dieta promedio del mexicano, sugiriendo que eran insignificantes desde el punto de vista en salud. Dos estudios financiados por la industria enfatizaron que no se observaron cambios en obesidad durante los primeros dos años del impuesto. [33,34] En contraste, estudios realizados por científicos sin vínculos con la industria asumieron que no se esperaba encontrar una reducción en las tasas de obesidad en estudios empíricos.[72] Sin embargo, tres estudios no financiados por la industria hicieron ejercicios de modelación considerando la reducción observada en el consumo de BA, para proyectar la prevalencia de obesidad en un periodo de 10 años, encontrando reducciones significativas. [73–75]

## CONCLUSIONES

Está bien documentado que las industrias dañinas para la salud financian científicos para que realicen estudios que debiliten nuevas regulaciones en salud, que si entraran en vigor, podrían amenazar los intereses comerciales.[22–24,76,77] El caso del impuesto mexicano a BA muestra que la resistencia de la industria puede persistir hasta después de que las políticas se conviertan en ley, estableciendo intereses que busquen revertir la legislación, y detener o prevenir la difusión de la política a nivel internacional. Inmediatamente después de la implementación, los mismos actores de la industria de alimentos y bebidas que se opusieron al impuesto a las BA ocuparon posiciones en consejos asesores del gobierno para monitorear su efectividad, y cabildearon con legisladores para reducir el impuesto. Documentos internos de la industria muestran que los ejecutivos de la industria de alimentos y bebidas temieron la difusión internacional del impuesto a BA e intentaron prevenir la difusión a nivel global, amplificando los resultados de estudios financiados por la industria y buscando combatir la evidencia que iba surgiendo sobre la efectividad del impuesto en México. Finalmente, después de que México implementó su impuesto, 35 países han adoptado medidas similares.[4,8]

Cuando las innovaciones en políticas de salud son tan nuevas que no cuentan aún con investigación empírica, estudios financiados por la industria pueden ser movilizadas rápidamente para definir una narrativa amigable a los intereses de la industria.[78–80] Las evaluaciones independientes del impuesto en México tardaron dos años en empezar a ser publicadas en revistas científicas con revisión por pares. En ese lapso, actores de la industria en México, con apoyo de una infraestructura global de organizaciones comerciales y falsos grupos científicos, lograron generar evidencia aparentemente creíble que sugería que la política era un fracaso. Los estudios financiados por la industria fueron publicados y diseminados en reuniones científicas para establecer una narrativa de que esta política estaba afectando desproporcionalmente a los hogares de bajo ingreso, que estaba produciendo una pérdida de empleos, y disminuyendo el PIB, mientras que no estaba logrando disminuir el consumo de BA ni combatir la obesidad. Esta narrativa se mostró como ciencia neutral e imparcial para su legitimidad. Por lo tanto, cuando la división mexicana del grupo científico de la industria, ILSI México, fue demasiado obvio en sus esfuerzos para debilitar el impuesto, fue rápidamente censurado y cerrado.

Nuestra revisión de literatura mostró que los estudios financiados por la industria rutinariamente emplearon estrategias discursivas para minimizar la efectividad de la política del impuesto a las BA en México. Estos utilizaron argumentos económicos (p. Ej., pérdida de empleos), de justicia social (p. Ej., el impuesto es regresivo), y argumentos de salud pública (p. Ej., el impuesto no redujo obesidad), similares a los usados anteriormente por la industria del tabaco.[26,27,81] La interferencia de la industria de bebidas y alimentos fue más allá de simplemente darle la vuelta a la evidencia emergente de la efectividad del impuesto. La investigación financiada por la industria fue utilizada dentro de México para alentar a los legisladores a disminuir el impuesto- una propuesta que fue aprobada en la Cámara de Diputados, pero fracasó en el Senado. Los medios de comunicación en México fueron importantes para exponer el reclutamiento de científicos estadounidenses para hablar en contra del impuesto. Es importante destacar la importancia de alertar a científicos, tomadores de

decisiones, y medios de comunicación sobre el conflicto de interés y por qué los intereses comerciales pueden sesgar los estudios de investigación.

Con el tiempo, los estudios financiados por la industria en México fueron diseminados a nivel global por los ejecutivos de la industria para buscar contener el impuesto a BA dentro de México. Conforme la amenaza de difusión a nivel internacional fue creciendo, los ejecutivos de corporaciones de bebidas transnacionales, como Coca-Cola, apoyados por sus asociaciones comerciales globales, amplificaron la narrativa dentro de sus redes argumentando que el impuesto mexicano fracasó. Estos estudios fueron discutidos en la prensa internacional durante el periodo previo a la reunión de alto nivel de ECNT de las Naciones Unidas, pero para entonces, estudios independientes y revisados por pares, mostraban evidencia contradictoria, lo que resultó en un moderado grado de apoyo al impuesto.

Los resultados de este estudio demuestran el rol decisivo de la investigación con revisión por pares que puede jugar en la implementación de políticas de salud pública progresivas. México creó un contexto real para los primeros estudios empíricos con revisión por pares que demostraron la efectividad del impuesto de BA. A pesar de la notable oposición de la industria a nivel global, las evaluaciones con revisión por pares del impuesto mexicano eventualmente ganaron la atención de los paneles de expertos internacionales sobre las ECNT.[60,65,82] Esto logró el respaldo de la ONU y de la OMS a impuestos a BA, preparando el escenario para la creciente adopción de dicha política en países de todo el mundo.

#### Afiliaciones de los autores

<sup>1</sup>Institute for Global Health Sciences, University of California San Francisco, San Francisco, California, EEUU

<sup>2</sup>School of Community Health Sciences, University of Nevada, Reno, Nevada, EEUU

<sup>3</sup>Ozmen Institute for Global Studies, University of Nevada, Reno, Nevada, EEUU

<sup>4</sup>Trinity Business School, Trinity College Dublin, Dublin, Irlanda

<sup>5</sup>World Public Health Nutrition Association, Londres, Reino Unido

<sup>6</sup>Philip R. Lee Institute for Health Policy Studies, University of California San Francisco, San Francisco, California, EEUU

<sup>7</sup>Department of Humanities and Social Sciences, University of California San Francisco, San Francisco, California, EEUU

**Twitter** Andrea Pedroza-Tobias @apedroz9, Melissa Mialon @MIALONMelissa y Angela Carriedo @acarriedo

**Agradecimientos** Los autores agradecen a Kate Tasker y Rachel Takata de la Industry Documents Library de la Universidad de California San Francisco por su apoyo y asistencia en el acervo, y a la Dra. Cristin Kearns por sus aportes sustantivos en esta investigación.

**Contribuciones** Todos los autores contribuyeron en la recolección de datos, análisis, interpretación y revisión del contenido intelectual de importancia. LS, EC y AP-T redactaron el manuscrito.

**Financiamiento** Este trabajo fue financiado por Bloomberg Philanthropies. AP-T cuenta con una beca del Consejo Nacional de Ciencia y Tecnología de México (CONACyT377279). Los financiadores no tuvieron ningún rol en el diseño, conducción, recolección, manejo, análisis e interpretación de los datos, ni en la preparación, revisión o aprobación del manuscrito.

**Conflicto de intereses** Ninguno declarado.

**Consentimiento de los pacientes para publicación** No requerido.

**Procedencia y revisión por pares** No comisionado; revisado externamente por pares.

Los datos están disponibles en un repositorio de acceso abierto al público.

**Material suplementario** Este contenido ha sido proporcionado por los autores. No ha sido revisado por BMJ Publishing Group Limited (BMJ) y podría no haber sido revisado por pares. Las opiniones y recomendaciones discutidas son únicamente de los autores y no están respaldados por BMJ. BMJ se deslinda de toda obligación o responsabilidad que surja de cualquier uso con confianza del contenido. Cuando el contenido incluye material traducido, BMJ no garantiza la exactitud y confiabilidad de las traducciones (incluyendo pero no limitado a regulaciones locales, guías clínicas, terminología, nombres de medicamentos y dosis de medicamentos), y no es responsable por cualquier error y/u omisión que surja por la traducción y adaptación u otras situaciones.

**Acceso Libre** Este es un artículo de acceso libre distribuido de acuerdo con la licencia Atribución-No Comercial de Creative Commons (CC BY-NC 4.0), que permite que otros distribuyan, remezclen, transformen, construyan a partir del material de forma no comercial y se licencien las obras derivadas en términos diferentes, siempre y cuando el material original sea debidamente citado, se dé crédito de manera adecuada, se indique si se han realizado cambios, y su uso sea sin propósitos comerciales. Ver: <https://creativecommons.org/licenses/by-nc/4.0/deed.es>

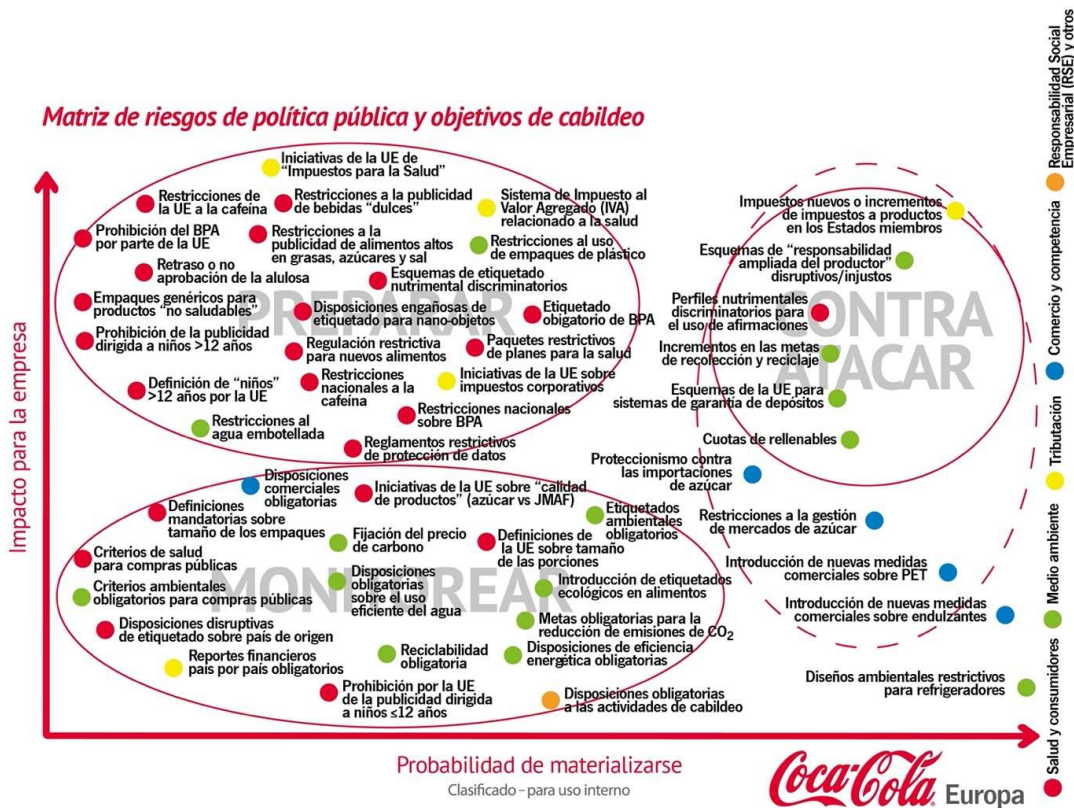

**Figura 1.** Coca-Cola Europa: Pantalla radar para monitorear amenazas de políticas públicas.

Fuente: Traducción propia a partir del documento de la colección D.C. Leaks que se encuentra en el acervo de los documentos de la industria ("*Food Industry Documents Archive*") de la Universidad de California San Francisco.[58] BPA: Bisfenol A; UE: Unión Europea; PET: Polietileno tereftalato; JMAF: Jarabe de maíz de alta fructosa



## REFERENCIAS

- 1 Conway J. Soft drink per capita consumption in the ten most populated countries worldwide 2019. statista. 2020.<https://www.statista.com/statistics/505794/cd-s-per-capita-consumption-in-worlds-top-ten-population-countries/>
- 2 World Health Organization. Global Health Observatory. 2015. <https://www.who.int/data/gho> (consultado 21 dic 2020).
- 3 Diario Oficial de la Federación. LEY DE INGRESOS DE LA FEDERACIÓN PARA EL EJERCICIO FISCAL DE 2014 . Capítulo I De los Ingresos y el Endeudamiento Público. 2014.[http://www.diputados.gob.mx/LeyesBiblio/abro/lif\\_2014.htm](http://www.diputados.gob.mx/LeyesBiblio/abro/lif_2014.htm) (consultado 20 may 2019).
- 4 World Cancer Research Fund International. Building momentum: lessons on implementing a robust sugar sweetened beverage tax. 2018. <https://www.wcrf.org/buildingmomentum>
- 5 Barquera S, Hernandez-Barrera L, Tolentino ML, *et al.* Energy Intake from Beverages Is Increasing among Mexican Adolescents and Adults. *J Nutr* 2008;**138**:2454–61. doi:10.3945/jn.108.092163
- 6 Colchero MA, Salgado JC, Unar-Munguía M, *et al.* Price elasticity of the demand for sugar sweetened beverages and soft drinks in Mexico. *Econ Hum Biol* 2015;**19**:129–37. doi:10.1016/j.ehb.2015.08.007
- 7 Nestle M. *Soda politics. Taking soda (and winning)*. Nueva York: Oxford University Press 2015.
- 8 Global Food Research Program. Sugary drink taxes around the world. 2020.[http://globalfoodresearchprogram.web.unc.edu/files/2020/08/SugaryDrink\\_tax\\_maps\\_2020\\_August\\_REV.pdf](http://globalfoodresearchprogram.web.unc.edu/files/2020/08/SugaryDrink_tax_maps_2020_August_REV.pdf)
- 9 Teng AM, Jones AC, Mizdrak A, *et al.* Impact of sugar-sweetened beverage taxes on purchases and dietary intake: Systematic review and meta-analysis. *Obes Rev* 2019;**20**:1187–204. doi:10.1111/obr.12868
- 10 Redondo M, Hernández-Aguado I, Lumbreras B. The impact of the tax on sweetened beverages: a systematic review. *Am J Clin Nutr* 2018;**108**:548–63. doi:10.1093/ajcn/nqy135
- 11 Backholer K, Sarink D, Beauchamp A, *et al.* The impact of a tax on sugar-sweetened beverages according to socio-economic position: a systematic review of the evidence. *Public Health Nutr* 2016;**19**:3070–84. doi:10.1017/S136898001600104X
- 12 Colchero MA, Popkin BM, Rivera JA, *et al.* Beverage purchases from stores in Mexico under the excise tax on sugar sweetened beverages: observational study. *BMJ* 2016;**352**:h6704.
- 13 Colchero MA, Rivera-Dommarco J, Popkin BM, *et al.* In México, Evidence of Sustained Consumer Response Two Years After Implementing a Sugar-Sweetened Beverage Tax. *Health Aff (Millwood)* 2017;**36**:564–71. doi:10.1377/hlthaff.2016.1231
- 14 Sánchez-Romero LM, Canto-Osorio F, González-Morales R, *et al.* Association between tax on sugar sweetened beverages and soft drink consumption in adults in Mexico: open cohort longitudinal analysis of Health Workers Cohort Study. *BMJ* 2020;**m1311**. doi:10.1136/bmj.m1311
- 15 Colchero MA, Molina M, Guerrero-López CM. After México Implemented a Tax, Purchases of Sugar-Sweetened Beverages Decreased and Water Increased: Difference by Place of Residence, Household Composition, and Income Level. *J Nutr* 2017;**147**:1552–7. doi:10.3945/jn.117.251892
- 16 Ng SW, Rivera JA, Popkin BM, *et al.* Did high sugar-sweetened beverage purchasers respond differently to the excise tax on sugar-sweetened beverages in Mexico? *Public Health Nutr* 2019;**22**:750–6. doi:10.1017/S136898001800321X
- 17 Barrientos-Gutiérrez T, Colchero MA, Sánchez-Romero LM, *et al.* Posicionamiento sobre los impuestos a alimentos no básicos densamente energéticos y bebidas azucaradas. *Salud Publica Mex* 2018;**60**:586. doi:10.21149/9534
- 18 Fooks GJ, Williams S, Box G, *et al.* Corporations' use and misuse of evidence to influence health policy: A case study of sugar-sweetened beverage taxation. *Global Health* 2019;**15**:1–20. doi:10.1186/s12992-019-0495-5
- 19 Gómez EJ. Coca-Cola's political and policy influence in Mexico: Understanding the role of institutions, interests and divided society. *Health Policy Plan* 2019;**34**:520–8. doi:10.1093/heapol/czz063
- 20 Barnoya J, Nestle M. The food industry and conflicts of interest in nutrition research: A Latin American perspective. *J Public Health Policy* 2016;**37**:552–9. doi:10.1057/jphp.2015.37
- 21 Carriedo A, Lock K, Hawkins B. Policy Process And Non-State Actors' Influence On The 2014 Mexican Soda Tax. *Health Policy Plan* 2020;**35**:941–52. doi:10.1093/heapol/czaa060
- 22 Ojeda E, Torres C, Carriedo A, *et al.* The influence of the sugar-sweetened beverage industry on public policies in México. *Int J Public Health* 2020;**65**:1037–44. doi:10.1007/s00038-020-01414-2
- 23 James E, Lajous M, Reich MR. The Politics of Taxes for Health: An Analysis of the Passage of the Sugar-Sweetened Beverage Tax in Mexico. *Heal Syst Reform* 2020;**6**. doi:10.1080/23288604.2019.1669122
- 24 Carriedo Lutzenkirchen A. A policy analysis of the 2014 Mexican soda tax. Londres, Reino Unido: 2017. doi:<https://doi.org/10.17037/PUBS.04648204>
- 25 University of California San Francisco. Food Industry Documents. 2020.<https://www.industrydocuments.ucsf.edu/food/> (consultado 20 dic 2020).
- 26 Mialon M, Julia C, Hercberg S, *et al.* The policy dystopia model adapted to the food industry: the example of the Nutri-Score saga in France. *World Nutr* 2018;**9**:109–20.

- 27 Ulucanlar S, Fooks GJ, Gilmore AB. The Policy Dystopia Model: An Interpretive Analysis of Tobacco Industry Political Activity. 2016;1–21. doi:10.1371/journal.pmed.1002125
- 28 Diario Oficial de la Federación. Acuerdo por el que se crea el Consejo Asesor del Observatorio Mexicano de Enfermedades No Transmisibles. 2014. [http://www.dof.gob.mx/nota\\_detalle.php?codigo=5361364&fecha=24/09/2014](http://www.dof.gob.mx/nota_detalle.php?codigo=5361364&fecha=24/09/2014)
- 29 Barquera S, Sánchez-Bazan K, Carriedo A, *et al.* The development of a national obesity and diabetes prevention and control strategy in Mexico: actors, actions and conflicts of interest. En: Mwatsama M, ed. *Public health and the food and drinks industry: The governance and ethics of interaction Lessons from research, policy and practice*. London: UK Health Forum 2018. 18–30.
- 30 Colchero M, Rivera J, Ng S-W, *et al.* Reducción en el consumo de bebidas con impuesto después de la implementación del impuesto en México. Inst. Nac. Salud Pública. 2015. <https://www.insp.mx/epppo/blog/3666-reduccion-consumo-bebidas.html> (consultado 28 oct 2020).
- 31 Ramirez M. Cierran 30 mil “tienditas” por reforma fiscal e inseguridad. Milenio. 2015. <https://www.milenio.com/negocios/cierran-30-mil-tienditas-reforma-fiscal-inseguridad> (consultado 28 oct 2020).
- 32 Romero-Tellaache J, Caldiño-García E, Minor-Campa E, *et al.* Efectos producidos en el bienestar de la sociedad por la política de tributar alimentos y bebidas altamente calóricos. Gastos y demanda por refrescos por hogar, 2012-2014. Ciudad de México: 2015.
- 33 Chapa-Cantú J, Flores-Curiel D, Zuñiga-Valero L. La industria de las bebidas no alcohólicas en México. Nuevo Leon: 2015. [https://impuestosaludable.org/wp-content/uploads/2013/06/La-industria-de-las-bebidas-no-alcohólicas-en-méxico\\_vf\\_UANL.pdf](https://impuestosaludable.org/wp-content/uploads/2013/06/La-industria-de-las-bebidas-no-alcohólicas-en-méxico_vf_UANL.pdf)
- 34 Aguilar A, Gutiérrez E, Seira E. Taxing calories in Mexico. 2015. <http://cie.itam.mx/sites/default/files/cie/15-04.pdf>
- 35 Consejo Coordinador Empresarial. Recomendaciones de ajustes a la legislación fiscal. 2015. [http://www.diputados.gob.mx/comhaciendaLXIII/Presentaciones/1\\_CCE/CCE\\_Presentacion.pdf](http://www.diputados.gob.mx/comhaciendaLXIII/Presentaciones/1_CCE/CCE_Presentacion.pdf) (consultado 29 oct 2020).
- 36 El Contribuyente. Las refresqueras empujaron la reducción del IEPS, denuncia ONG. 2015. <https://www.elcontribuyente.mx/2015/10/las-refresqueras-empujaron-la-reduccion-del-ieps-denuncia-ong/> (consultado 29 oct 2020).
- 37 Maerker D. No hay interés de beneficiar a refresqueros: dip. PRI. Con Denise Maerker. 2015. <https://www.radioformula.com.mx/audio-y-video/atando-cabos/20151021/no-hay-interes-de-beneficiar-a-refresqueros-dip-pri-con-denise-maerker/> (consultado 29 oct 2020).
- 38 ILSI México: International Life Sciences Institute. <http://ilsi-mexico.org/> (consultado 28 jul 2020).
- 39 Rippe Lifestyle Institute: Partners & Programs. <http://rippehealth.com/rippelifestyle/partnersprograms.htm> (consultado 28 jul 2020).
- 40 John, Peters C; Hill J, University of Colorado. Slight Change in Plans for Mexico Symposium: From Dr. James Rippe. 2015 mayo 14. USRTK Food Ind. Collect. US Right to Know. <https://www.industrydocuments.ucsf.edu/docs/qzyk0228> (consultado 20 oct 2020).
- 41 EFE. Obesidad es un problema de calorías, no de consumo de azúcar, según expertos. 2015. <https://www.efe.com/efe/america/mexico/obesidad-es-un-problema-de-calorias-no-consumo-azucar-segun-expertos/50000545-2702788> (consultado 18 abr 2020).
- 42 Federación Mexicana de Diabetes. Expertos hablan sobre relación entre consumo de azúcares y aumento de obesidad. 2015. <http://fmdiabetes.org/expertos-hablan-sobre-relacion-entre-consumo-de-azucares-y-aumento-de-obesidad/> (consultado 19 abr 2020).
- 43 Rippe J. Sweeteners and Health. 2015.
- 44 White J, Sievenpiper J, Rippe J, *et al.* *Sweeteners and health: A review of the scientific literature*. ILSI Mex. 2015.
- 45 Reforma Redacción. Denuncian ‘ciencia chatarra’. Reforma. 2015. <https://www.reforma.com/aplicaciones/articulo/default.aspx?id=632456&v=3&referer=7d616165662f3a3a6262623b727a7a7279703b767a78--> (consultado 9 dic 2020).
- 46 Alianza por la Salud Alimentaria. Corporaciones de alimentos y bebidas traen “ciencia chatarra” a México para negar daños a salud y combatir el impuesto - Alianza por la Salud Alimentaria. 2015. <https://alianzasalud.org.mx/2015/09/corporaciones-de-alimentos-y-bebidas-traen-ciencia-chatarra-a-mexico-para-negar-danos-a-salud-y-combatir-el-impuesto/> (consultado 28 oct 2020).
- 47 ILSI. International Life Sciences Institute Suspends ILSI Mexico’s Charter. 2015. <https://ilsi.org/wp-content/uploads/2019/06/ILSI-Mexico-Suspension.pdf> (consultado 4 abr 2020).
- 48 Peters JC, University of Colorado Anschutz Health and Wellness Center. [Correo electrónico de John C Peters Regarding the Update]. 2015 noviembre 09. USRTK Food Ind. Collect. US Right to Know. <https://www.industrydocuments.ucsf.edu/docs/s/#id=hmlk0228> (consultado 28 oct 2020).
- 49 Comisión de Hacienda y Crédito Público. Declaratoria de publicidad de dictámenes. México: 2015. <http://gaceta.diputados.gob.mx/PDF/63/2015/oct/20151019-III-1.pdf> (consultado 29 oct 2020).
- 50 Senado de México. Sesión ordinaria de la H. Cámara de senadores celebrada el miércoles 28 de octubre del 2015. 2015. [https://www.senado.gob.mx/64/version\\_estenografica/2015\\_10\\_28/1660](https://www.senado.gob.mx/64/version_estenografica/2015_10_28/1660) (consultado 29 oct 2020).
- 51 Conferencia “Obesity: Causes and Public Policy

Responses” | Eventos y Noticias. <https://eventos.itam.mx/es/3/eventos/2016/03/09/conferencia-obesity-causes-and-public-policy-responses> (accessed 10 Dec 2020).

52 Impuestos Calóricos. <http://impuestoscaloricos.com/> (consultado 7 ene 2021).

53 Goltzman M, Chantreau E. FW: INFORM: France Tax Threats Defeated. 2015 diciembre 21. DC Leaks Coca Cola Emails. DC Leaks. <https://www.industrydocuments.ucsf.edu/docs/#id=rtcl0226> (consultado 12 dic 2020).

54 Goltzman M. Fwd: JQ Interview El Tiempo Colombia 013016. 2016 enero 31. DC Leaks Coca Cola Emails. DC Leaks. <https://www.industrydocuments.ucsf.edu/docs/#id=mycl0226> (consultado 2 dic 2020).

55 Goltzman M, Waichungo W, Sancroft. Please Take Note: SRA Top Issues - Policy Briefs. 2016 Enero; DC Leaks Coca Cola Emails. DC Leaks. <https://www.industrydocuments.ucsf.edu/docs/#id=mycl0226> (accessed 2 Dec 2020).

56 Goltzman M, Banks H. INFORM: Israel tax threat. 2016 April 18. DC Leaks Coca Cola Emails. DC Leaks. <https://www.industrydocuments.ucsf.edu/docs/#id=tmcl0226> (consultado 2 feb 2020).

57 Goltzman M. FW: INFORM: Global Government Relations Dashboard - March 2016. 2016 April 04. DC Leaks Coca Cola Emails. DC Leaks. <https://www.industrydocuments.ucsf.edu/docs/grcl0226> (consultado 2 feb 2020).

58 Coca Cola Europe. Radar Screen of EU Public Policies. Monthly Issue update: febrero y marzo 2016. <https://www.documentcloud.org/documents/34098-08-EU-Radar-Screen-Issue-Update-2016-02-03.html> (consultado 2 dic 2020).

59 Goltzman M. FW: INFORM: México Excise Tax Materials & Resources. 2015 July 15. DC Leaks Coca Cola Emails. DC Leaks. <https://www.industrydocuments.ucsf.edu/docs/#id=pfdl0226> (consultado 12 jul 2019).

60 World Health Organization. *Report of the commission on ending childhood obesity*. Ginebra, Suiza: 2016. [http://apps.who.int/iris/bitstream/10665/204176/1/9789241510066\\_eng.pdf?ua=1](http://apps.who.int/iris/bitstream/10665/204176/1/9789241510066_eng.pdf?ua=1)

61 Lemming J, Goltzman M. INFORM: New York Times Article on Soda Taxes. 2016 marzo 14. DC Leaks Coca Cola Emails. <https://www.industrydocuments.ucsf.edu/docs/lrcl0226> (consultado 20 feb 2020).

62 Goltzman M, Tressler K. INFORM: Walls Street Journal Study in beverage tax impact in México. DC Leaks. Coca Cola Emails. 2016. <https://www.industrydocuments.ucsf.edu/docs/gkcl0226> (consultado 2 feb 2020).

63 International Council of Beverages Association. International Council of Beverages Associations’ Response to Health Affairs Journal Article on the Mexico Sugar-Sweetened Beverage Tax. Boletín de prensa. 2017. <http://www.icba-net.org/news-events/news/details/19/> (consultado 8 dic 2020).

64 International Council of Beverages Association. A Dozen Reasons Why Soft Drink Taxes Fall Flat (Fact sheet). [https://www.icba-net.org/files/resources/final-icba\\_12-reasons-why\\_english.pdf](https://www.icba-net.org/files/resources/final-icba_12-reasons-why_english.pdf)

65 Sassi F, Belloni A, Mirelman AJ, *et al*. Equity impacts of price policies to promote healthy behaviours. *Lancet* 2018;**391**:2059–70. doi:10.1016/S0140-6736(18)30531-2

66 Goltzman, Michael; Vermeulen W. FW: INFORM: World Health Assembly, 23-28 mayo. DC Leaks Coca Cola Emails. DC Leaks. 2016 mayo 21. <https://www.industrydocuments.ucsf.edu/docs/kqc10226> (consultado 10 dic 2019).

67 World Health Organization. Time to deliver: Report of the WHO Independent High-Level Commission on - - Noncommunicable Diseases. Ginebra, Suiza: World Health Organization 2018.

68 International Council of Beverages Association. Re: Comments on the Draft first report of the WHO Independent High-Level Commission on Non-Communicable Diseases. 2018. <https://www.who.int/ncds/governance/high-level-commission/International-Council-of-Beverages-Associations.pdf?ua=1>

69 Keaten J, Cheng M. U.S. blocks UN health panel from backing taxes on sugar drinks. PBS. 2018. <https://www.pbs.org/newshour/health/un-health-panel-backs-away-from-taxing-sugary-drinks> (consultado 10 dic 2020).

70 Guerrero-López CM, Molina M, Colchero MA. Employment changes associated with the introduction of taxes on sugar-sweetened beverages and nonessential energy-dense food in México. *Prev Med (Baltim)* 2017;**105**:S43–9. doi:10.1016/j.ypmed.2017.09.001

71 Colchero MA, Guerrero-López CM, Molina M, *et al*. Beverages sales in Mexico before and after implementation of a sugar sweetened beverage tax. *PLoS One* 2016;**11**:4–11. doi:10.1371/journal.pone.0163463

72 Popkin BM. Mexican cohort study predates but predicts the type of body composition changes expected from the mexican sugar-sweetened beverage tax. *Am J Public Health* 2017;**107**:1702–3. doi:10.2105/AJPH.2017.304097

73 Basto-Abreu A, Barrientos-Gutiérrez T, Vidaña-Pérez D, *et al*. Cost-Effectiveness Of The Sugar-Sweetened Beverage Excise Tax In Mexico. *Health Aff (Millwood)* 2019;**38**:1824–31. doi:10.1377/hlthaff.2018.05469

74 Barrientos-Gutierrez T, Zepeda-Tello R, Rodrigues ER, *et al*. Expected population weight and diabetes impact of the 1-peso-per-litre tax to sugar sweetened beverages in Mexico. *PLoS One* 2017;**12**:1–15. doi:10.1371/journal.pone.0176336

75 Sánchez-Romero LM, Penko J, Coxson PG, *et al*. Projected Impact of Mexico’s Sugar-Sweetened Beverage Tax Policy on Diabetes and

- Cardiovascular Disease: A Modeling Study. *PLoS Med* 2016;**13**:e1002158.  
doi:10.1371/journal.pmed.1002158
- 76 Crosbie E, Sosa P, Glantz SA. Costa Rica's implementation of the Framework Convention on Tobacco Control: Overcoming decades of industry dominance. *Salud Publica Mex* 2016;**58**:62–70.  
doi:10.21149/spm.v58i1.7669
- 77 White M, Barquera S. México Adopts Food Warning Labels, Why Now? *Heal Syst Reform* 2020;**6**:e1752063.  
doi:10.1080/23288604.2020.1752063
- 78 Crosbie E, Thomson G, Freeman B, *et al.* Advancing progressive health policy to reduce NCDs amidst international commercial opposition: Tobacco standardised packaging in Australia. *Glob Public Health* 2018;**13**:1753–66.  
doi:10.1080/17441692.2018.1443485
- 79 Bhatta DN, Crosbie E, Bialous SA, *et al.* Defending Comprehensive Tobacco Control Policy Implementation in Nepal From Tobacco Industry Interference (2011–2018). *Nicotine Tob Res* Published Online First: 20 April 2020.  
doi:10.1093/ntr/ntaa067
- 80 Crosbie E, Sosa P, Glantz SA. The importance of continued engagement during the implementation phase of tobacco control policies in a middle-income country: the case of Costa Rica. *Tob Control* 2017;**26**:60–8.  
doi:10.1136/tobaccocontrol-2015-052701
- 81 Mialon M, Gaitan Charry DA, Cediél G, *et al.* 'I had never seen so many lobbyists': food industry political practices during the development of a new nutrition front-of-pack labelling system in Colombia. *Public Health Nutr* 2020;:1–9.  
doi:10.1017/S1368980020002268
- 82 World Health Organization. *Fiscal Policies for Diet and Prevention of Noncommunicable Diseases. Technical meeting report.* Ginebra, Suiza: 2015.
